# Supplementary material for: Moderate route for the utilization of CO2-microwave induced copolymerization with cyclohexene oxide using highly efficient double metal cyanide complex catalysts based on Zn3[Co(CN)6]
Source: Royal Society of Chemistry journal article supplement (doi:10.1039/b801132j), 2008-01-01

## **Electronic Supplementary Information (ESI)**

### **Green and moderate route for the utilization of CO<sub>2</sub> - Microwave induced copolymerization with cyclohexene oxide using highly efficient double metal cyanide complex catalysts based on Zn<sub>3</sub>[Co(CN)<sub>6</sub>]**

Manju Mamparabath Dharman, Ji-Yeon Ahn, Mi-Kyung Lee, Hye-Lim Shim, Kyung Hoon Kim, Il Kim and Dae-Won Park\*

Division of Chemical Engineering, Pusan National University, Gumjung-gu, Busan 609-735, Korea. Fax: +82-51-512-8563; Tel: +82-51-510-2399; E-mail: [dwpark@pusan.ac.kr](mailto:dwpark@pusan.ac.kr)

1. Characterization of DMC complexes.
  - 1.1. Elemental composition of DMC complexes.
  - 1.2. XPS spectra of DMC complexes.
2. Polymer characterizations
  - 2.1. FT-IR spectra of reaction mixture in CH<sub>2</sub>Cl<sub>2</sub>.
  - 2.2. <sup>1</sup>H-NMR spectra of representative copolymers.
  - 2.3. <sup>13</sup>C-NMR spectra of representative copolymer.
  - 2.4. GPC of representative copolymers.

## 1. Characterization of DMC complexes.

### 1.1. Elemental composition of DMC complexes.

Table S1. Elemental composition of DMC complexes

| Sample | %C    | %H    | %N    | %Zn   | %Co    |
|--------|-------|-------|-------|-------|--------|
| DMC-1  | 23.46 | 3.911 | 13.83 | 29.76 | 3.61   |
| DMC-2  | 24.10 | 4.359 | 14.06 | 19.32 | 0.9622 |
| DMC-3  | 30.88 | 4.483 | 12.15 | 15.58 | 0.6760 |
| DMC-4  | 23.07 | 4.435 | 13.52 | 12.09 | 0.7154 |
| DMC-5  | 22.34 | 4.303 | 15.33 | 18.31 | 7.92   |

Obtained from elemental analysis and ICP-OES analyses.

## 1.2. XPS spectra of DMC complexes.

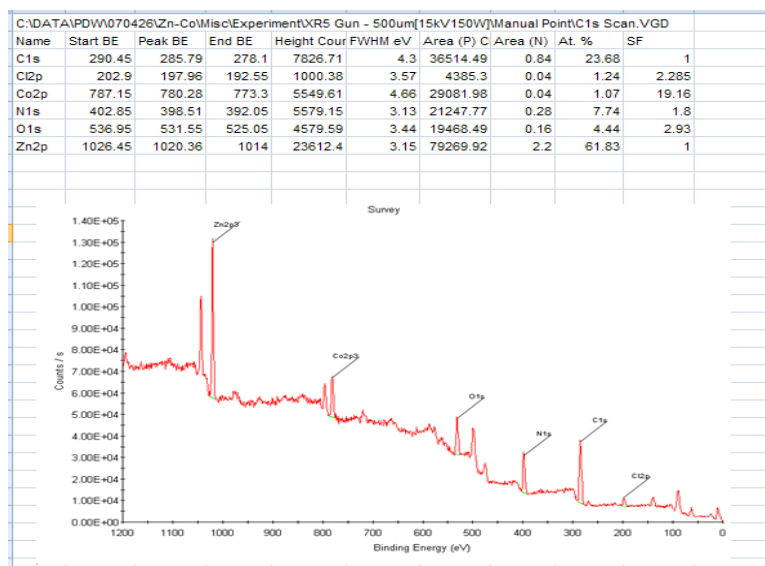

Fig. S1. XPS data of DMC-1 catalyst

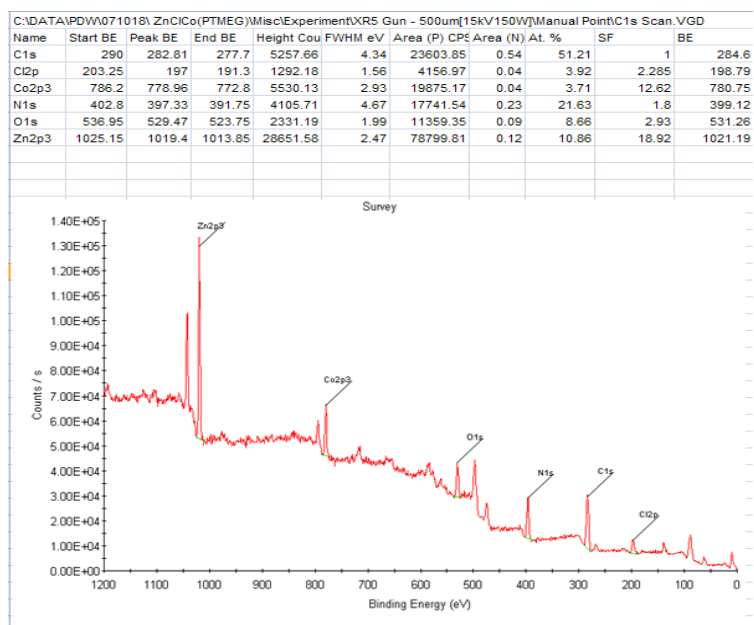

Fig. S2. XPS data of DMC-2 catalyst

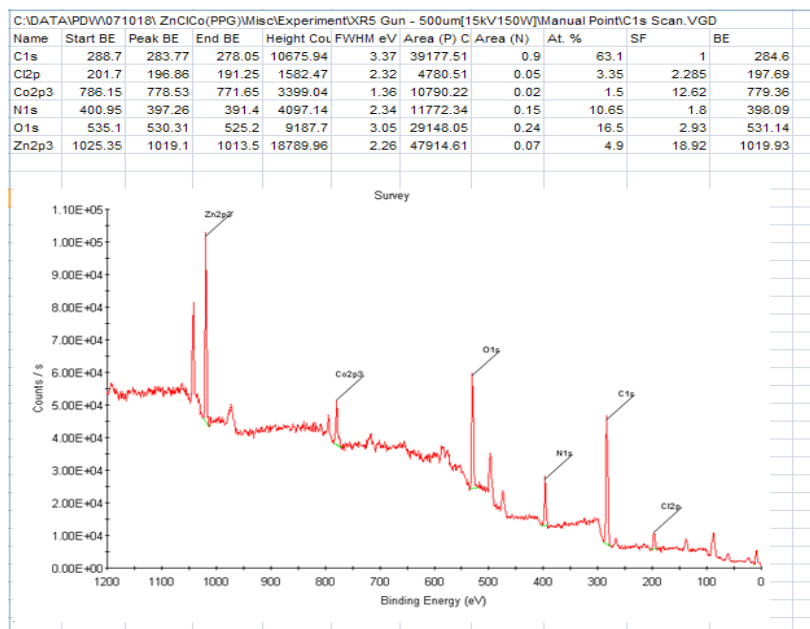

Fig. S3. XPS data of DMC-3 catalyst

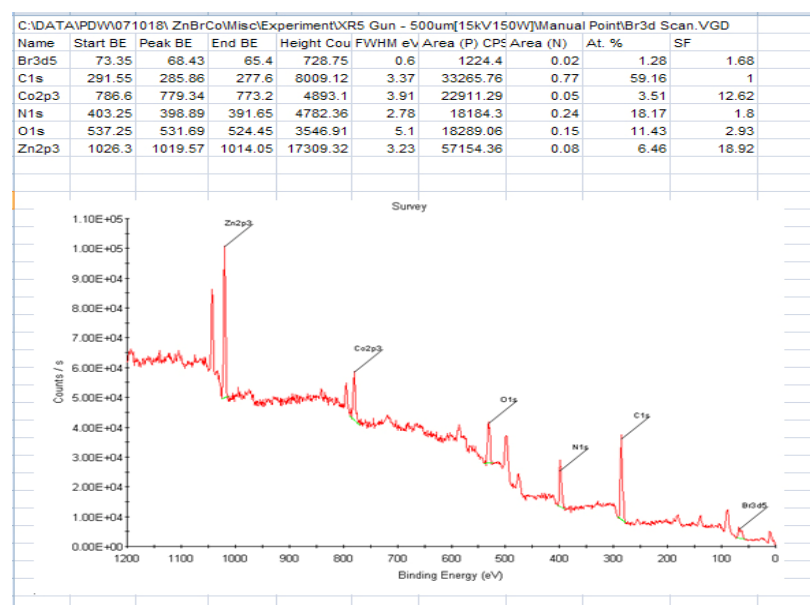

Fig. S4. XPS data of DMC-4 catalyst

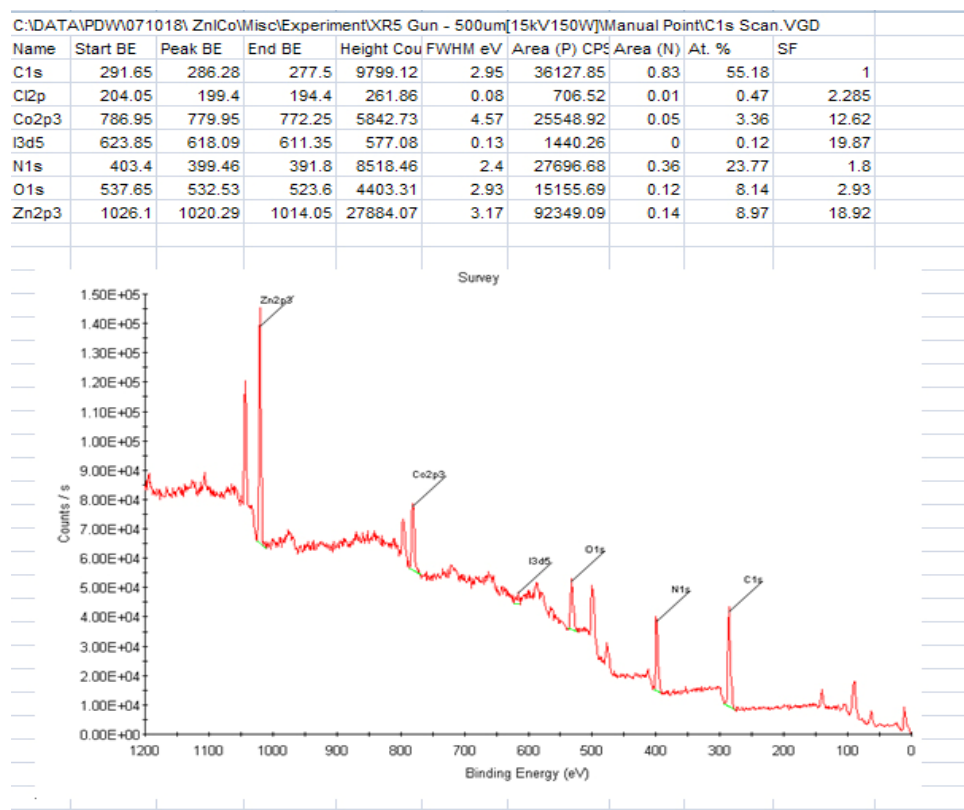

Fig. S5. XPS data of DMC-5 catalyst

## 2. Polymer characterizations.

### 2.1. FT-IR spectra of reaction mixture in CH<sub>2</sub>Cl<sub>2</sub>.

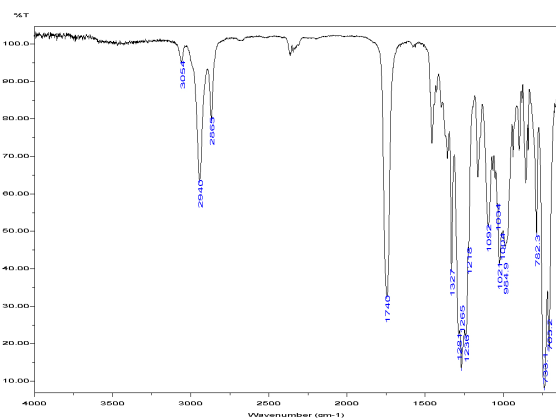

Fig. S6. Reaction condition: CHO-2.5 ml, DMC-1 - 5mg, P<sub>CO2</sub>-9.7 bar, 100 W, 30 min

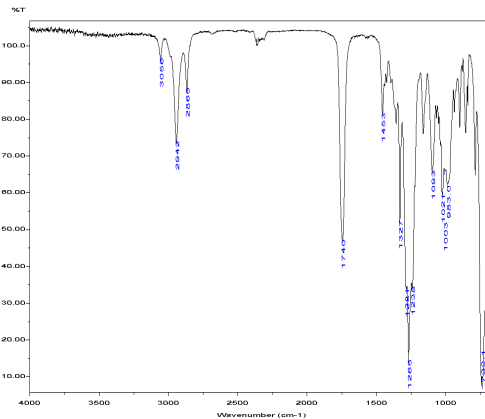

Fig. S7. Reaction condition: CHO-5 ml, DMC-1 - 5mg, P<sub>CO2</sub>-9.7 bar, 100 W, 30 min

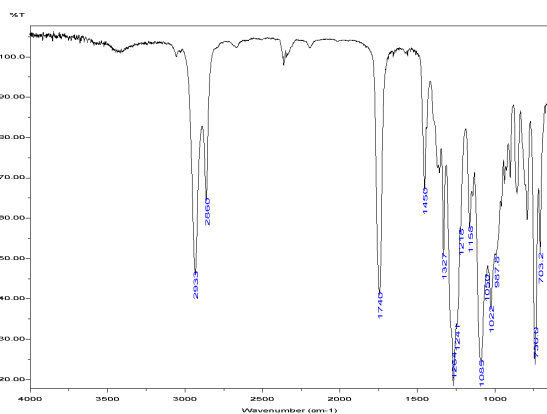

Fig. S8. Reaction condition: CHO-5 ml, DMC-1 - 10mg, P<sub>CO2</sub>-9.7 bar, 200 W, 4.5 min

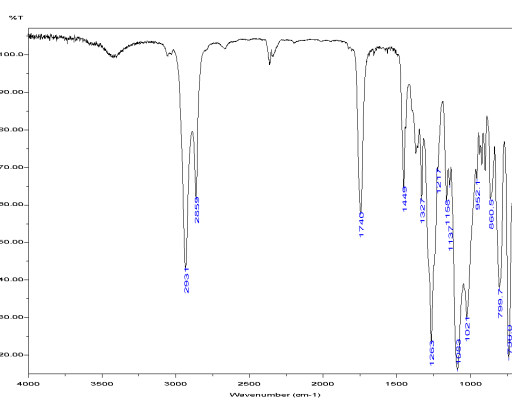

Fig. S9. Reaction condition: CHO-5 ml, DMC-1 - 20mg, P<sub>CO2</sub>-9.7 bar, 100 W, 6 min

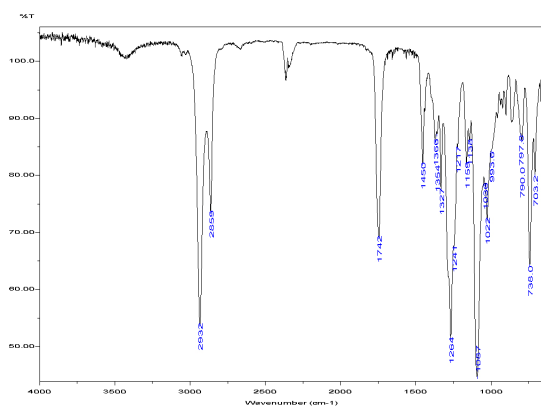

Fig. S10. Reaction condition: CHO-5 ml, DMC-1 -  
10mg, P<sub>CO2</sub>-9.7 bar, 300 W, 4 min

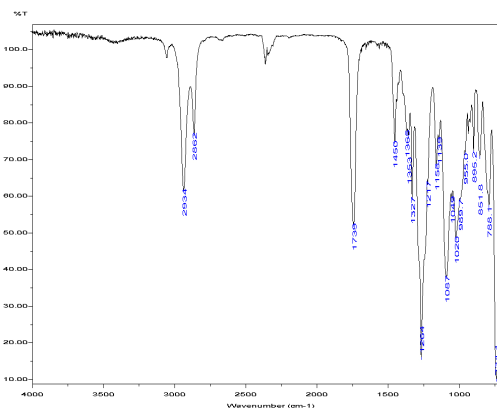

Fig. S11. Reaction condition: CHO-5 ml, DMC-1  
- 10mg, P<sub>CO2</sub>-9.7 bar, 400 W, 3.5 min

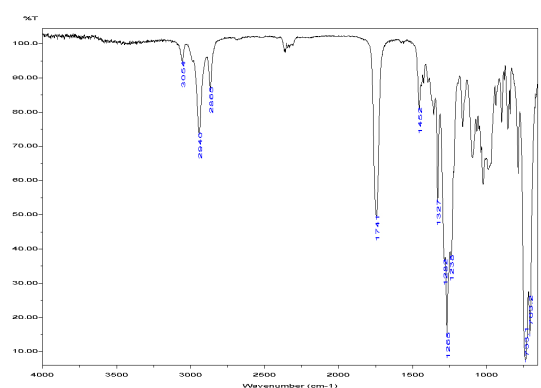

Fig. S12. Reaction condition: CHO-5 ml, DMC-2 -  
5mg, P<sub>CO2</sub>-9.7 bar, 100 W, 30 min

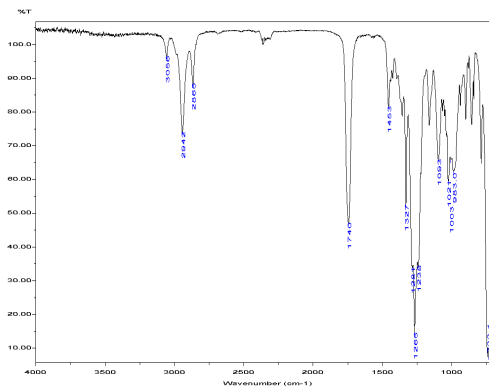

Fig. S13. Reaction condition: CHO-5 ml, DMC-3  
- 5mg, P<sub>CO2</sub>-9.7 bar, 100 W, 30 min

2.2. <sup>1</sup>H-NMR spectra of representative copolymers.

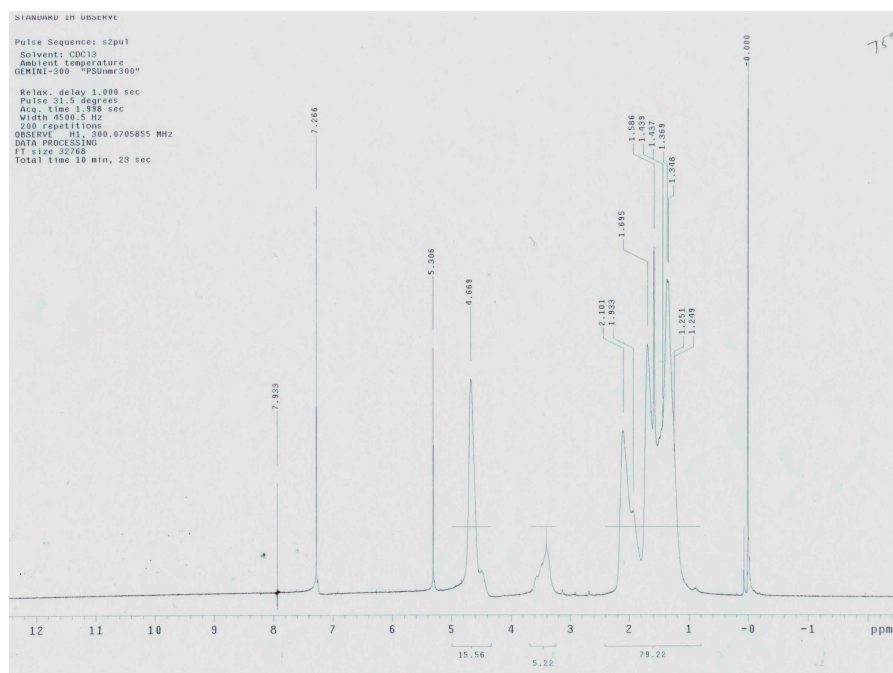



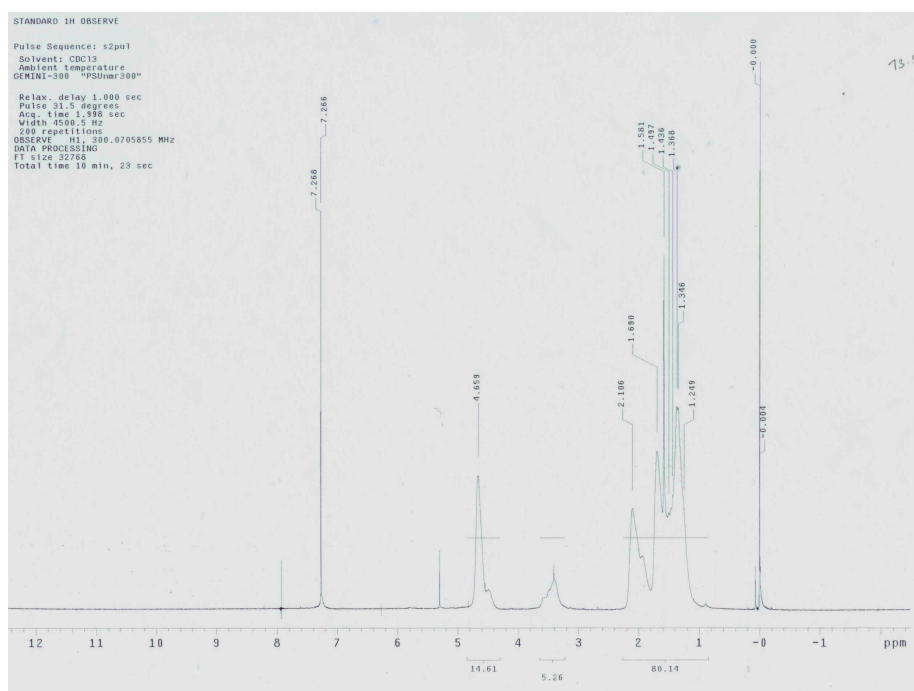

2.3.  $^{13}\text{C}$ -NMR spectra of representative copolymer.

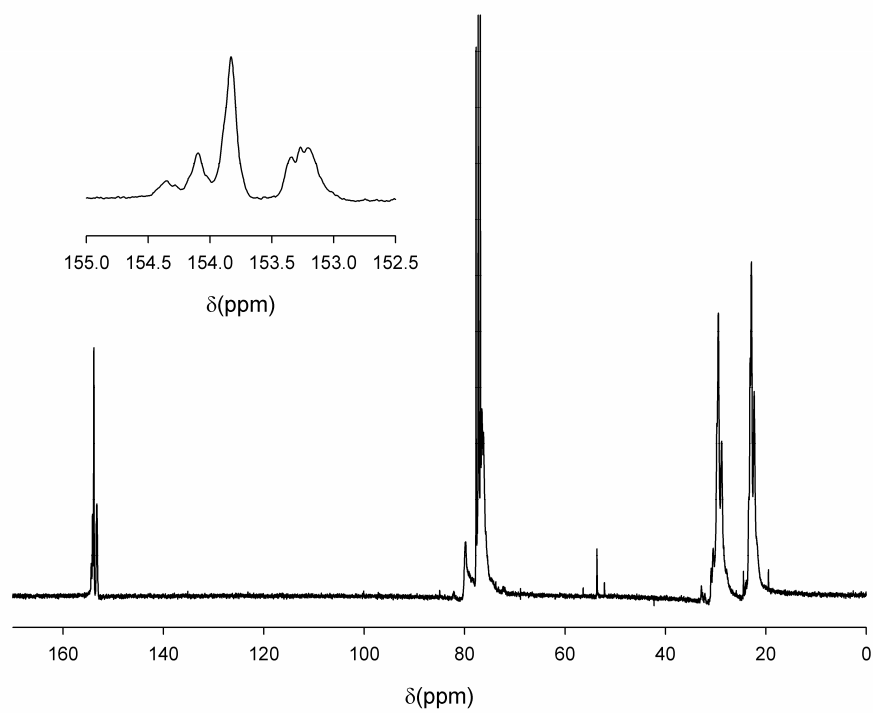

2.4. GPC of representative copolymers.

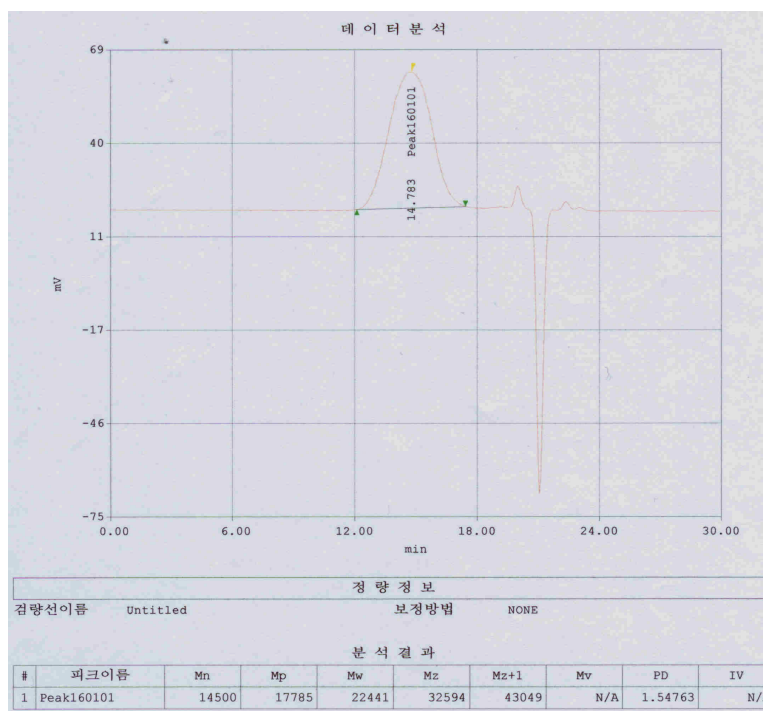

Supplement: b801132j.pdf [file b801132j.pdf]
